# Supplementary material
Source: Research Square preprint supplement (doi:10.21203/rs.3.rs-8967489/v1)
Supplement: Supplementary file 1 [file 7750fe1252dac25e1d5dac13.docx]

**Microplastic Contamination in a Major Turkish River: Evidence from Water and Sediment of the Sakarya River**

Akif Er1, Cantekin Dursun2, Nagihan Demirci2, Yusuf Ceylan1*, Serkan Gül2

1 Faculty of Fisheries, Recep Tayyip Erdoğan University, 53100, Rize, Türkiye

2 Department of Biology, Faculty of Arts and Sciences, Recep Tayyip Erdoğan University, 53100, Rize, Türkiye

*Corresponding: yusuf.ceylan@erdogan.edu.tr

S1. The proportion of each MP items based on nested MP categories

# A tibble: 30 × 7

# Groups: Environment, Type, Shape, Colour [20]

Environment Type Shape Colour Station n percent

*<chr>* *<chr>* *<chr>* *<chr>* *<dbl>* *<int>* *<dbl>*

1 Sediment PA Fragment White 4 1 0.5

2 Sediment PA Fragment White 5 1 0.5

3 Sediment PAN Fiber Transparent 3 1 1

4 Sediment PE Fragment Red 5 1 1

5 Sediment PE Fragment Yellow 5 1 1

6 Sediment PET Fiber Blue 2 1 0.333

7 Sediment PET Fiber Blue 7 1 0.333

8 Sediment PET Fiber Blue 8 1 0.333

9 Sediment PET Fiber Navy Blue 4 1 0.5

10 Sediment PET Fiber Navy Blue 5 1 0.5

11 Sediment PS Fragment Green 6 1 1

12 Water ABS Fragment Black 5 1 1

13 Water PAN Fiber Red 5 1 1

14 Water PET Fiber Black 9 1 1

15 Water PET Fiber Blue 5 1 0.5

16 Water PET Fiber Blue 6 1 0.5

17 Water PET Fiber Navy Blue 8 1 0.5

18 Water PET Fiber Navy Blue 9 1 0.5

19 Water PET Fiber Transparent 5 1 0.5

20 Water PET Fiber Transparent 9 1 0.5

21 Water PET Fragment Gray 4 1 1

22 Water PMMA Fragment Blue 8 1 1

23 Water PP Fragment White 4 1 1

24 Water PVA Fiber Gray 3 1 1

25 Water PVA Fiber Navy Blue 9 1 1

26 Water PVA Fragment Pink 3 1 1

27 Water PVC Fragment Pink 1 2 0.286

28 Water PVC Fragment Pink 4 1 0.143

29 Water PVC Fragment Pink 5 1 0.143

30 Water PVC Fragment Pink 7 3 0.429

table(Station, Colour)

Black Blue Gray Green Navy Blue Pink Red Transparent White Yellow

1 0 0 0 0 0 2 0 0 0 0

2 0 1 0 0 0 0 0 0 0 0

3 0 0 1 0 0 1 0 1 0 0

4 0 0 1 0 1 1 0 0 2 0

5 1 1 0 0 1 1 2 1 1 1

6 0 1 0 1 0 0 0 0 0 0

7 0 1 0 0 0 3 0 0 0 0

8 0 2 0 0 1 0 0 0 0 0

9 1 0 0 0 2 0 0 1 0 0

table(Station, Type)

ABS PA PAN PE PET PMMA PP PS PVA PVC

1 0 0 0 0 0 0 0 0 0 2

2 0 0 0 0 1 0 0 0 0 0

3 0 0 1 0 0 0 0 0 2 0

4 0 1 0 0 2 0 1 0 0 1

5 1 1 1 2 3 0 0 0 0 1

6 0 0 0 0 1 0 0 1 0 0

7 0 0 0 0 1 0 0 0 0 3

8 0 0 0 0 2 1 0 0 0 0

9 0 0 0 0 3 0 0 0 1 0

table(Station, Shape)

Fiber Fragment

1 0 2

2 1 0

3 2 1

4 1 4

5 4 5

6 1 1

7 1 3

8 2 1

9 4 0

table(Environment, Colour)

Black Blue Gray Green Navy Blue Pink Red Transparent White Yellow

Sediment 0 3 0 1 2 0 1 1 2 1

Water 2 3 2 0 3 8 1 2 1 0

table(Environment, Shape)

Fiber Fragment

Sediment 6 5

Water 10 12

table(Environment, Type)

ABS PA PAN PE PET PMMA PP PS PVA PVC

Sediment 0 2 1 2 5 0 0 1 0 0

Water 1 0 1 0 8 1 1 0 3 7
